# Supplementary material for: Mapping the Emerald Forest: Exploring Structural Diversity and Regeneration Patterns in Panna Tiger reserve, Central India
Source: Research Square preprint supplement (doi:10.21203/rs.3.rs-7939381/v1), 2025-11-07

Online resource 1. Variable Importance index for Forest type mapping using radom forest classifer


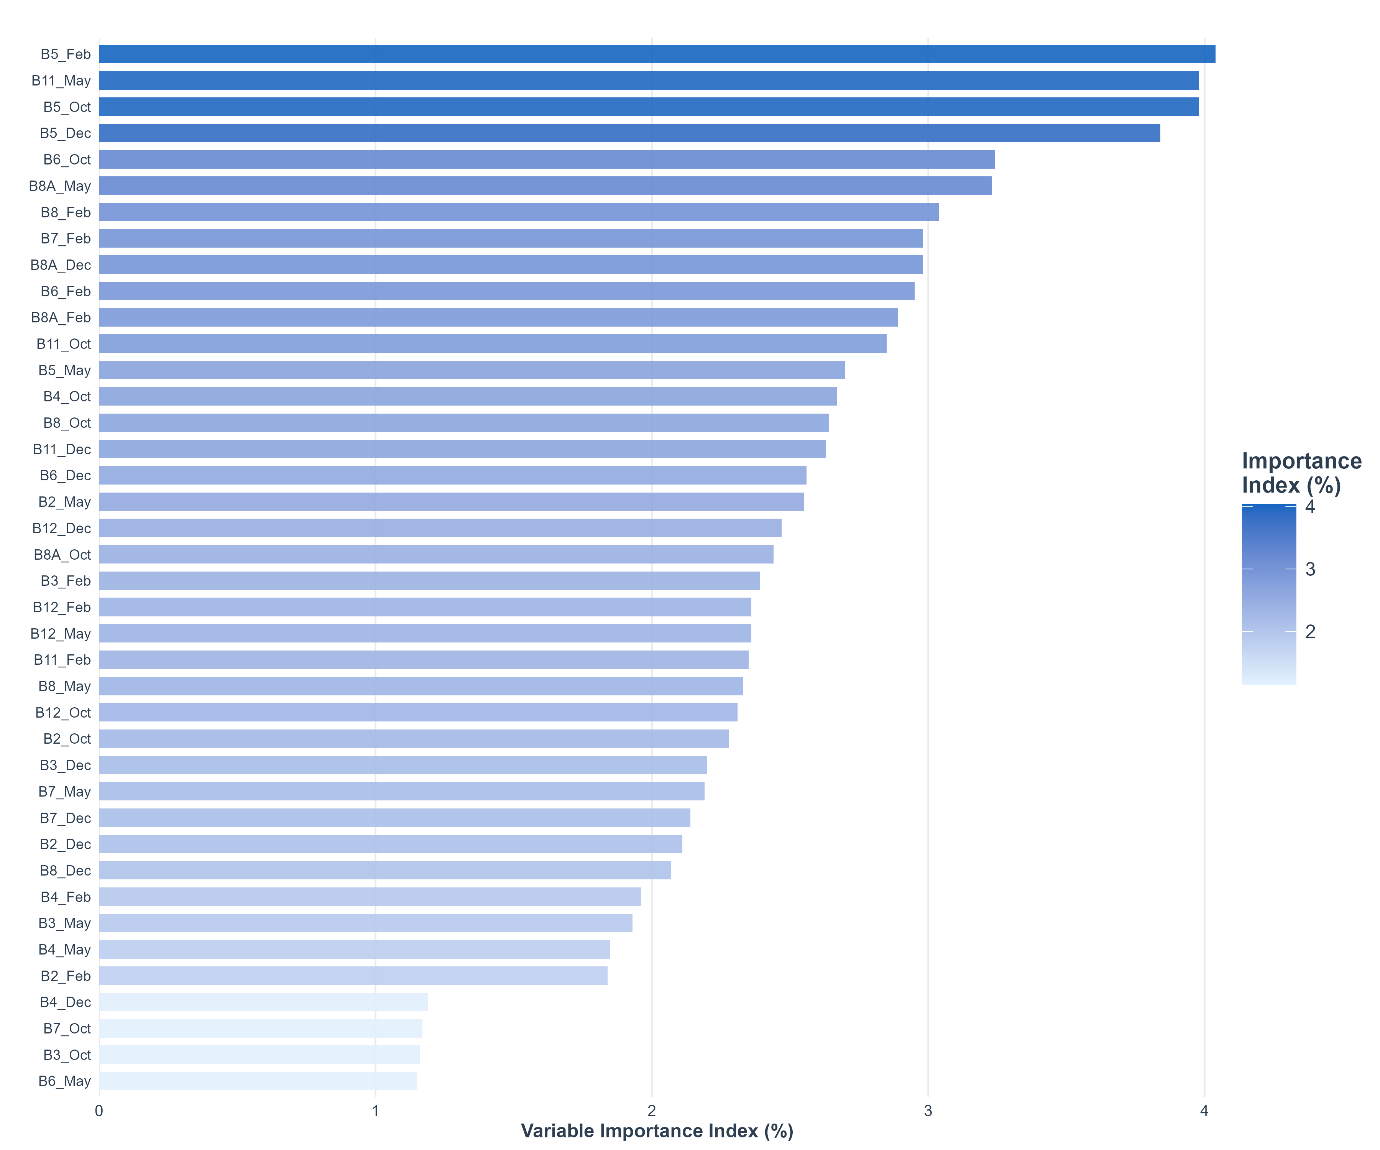

Supplement: Supplementary file 1 [file 46697323d4eb872f92e19fce.docx]
